# Supplementary material for: Tin perovskite/fullerene planar layer photovoltaics: improving the efficiency and stability of lead-free devices
Source: Royal Society of Chemistry journal article supplement (doi:10.1039/c5ta02950c), 2015-01-01
Supplement: c5ta02950c1.pdf [file c5ta02950c1.pdf]

## Tin Perovskite / Fullerene Planar Layer Photovoltaics: Improving the Efficiency and Stability of Lead-Free Devices

Kenneth P. Marshall<sup>a</sup>, Richard I. Walton<sup>a</sup> and Ross A. Hatton<sup>a\*</sup>

Department of Chemistry, University of Warwick, CV4 7AL, United Kingdom.

### Supporting Information

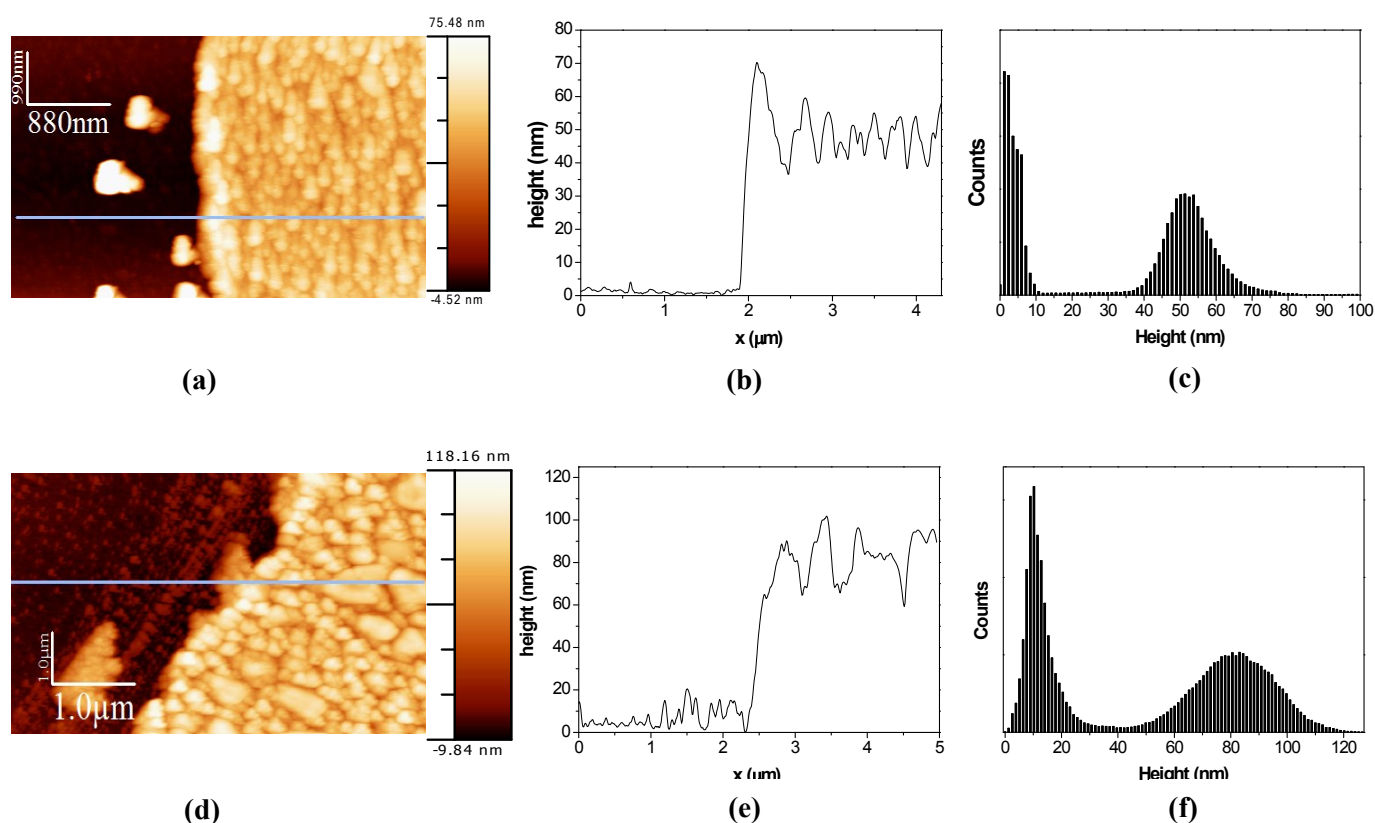

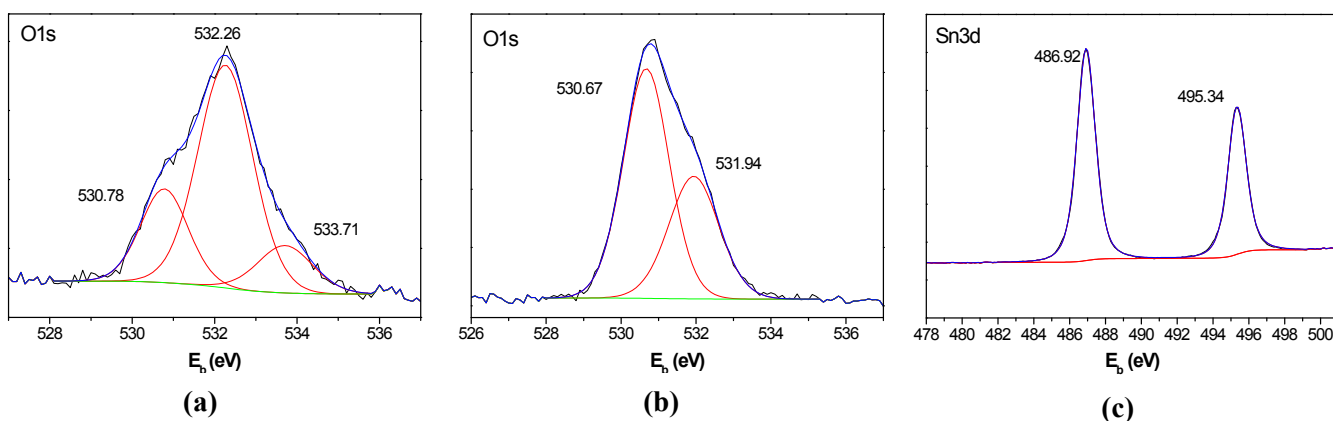

**Figure S2:** High resolution XPS spectra and peak fitting for: **(a)** O1s of CsSnI<sub>3</sub> film prepared from stoichiometric quantities of CsI and SnI<sub>2</sub>; **(b)** O1s region for CsSnI<sub>3</sub> oxidised in air for 5 hours. The peaks at ~530.7 eV and ~531.9 eV are indicative of SnO<sub>2</sub><sup>1,2</sup> and adsorbed O<sub>2</sub><sup>3</sup> respectively.; **(c)** Sn 3d region for CsSnI<sub>3</sub> oxidised for 5 hours. There are two peaks due to spin-orbit splitting that correspond to electrons from the 3d<sub>5/2</sub> and 3d<sub>3/2</sub> states. The difference in binding energy of Sn 3d electrons in Cs<sub>2</sub>SnI<sub>6</sub> and SnO<sub>2</sub><sup>2,4</sup> cannot be resolved.

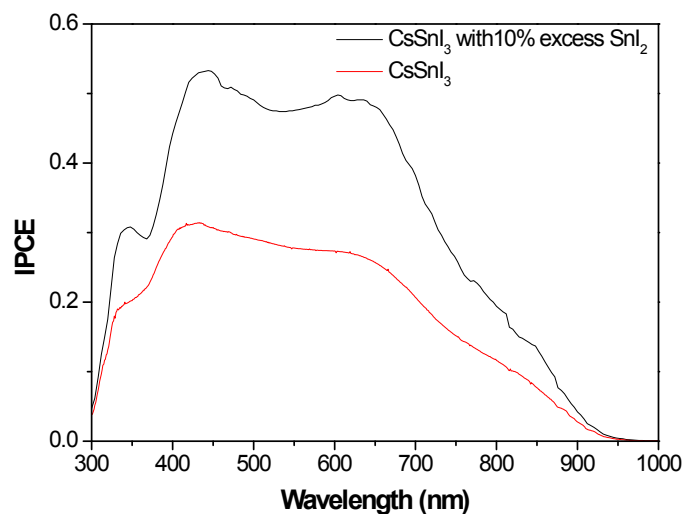

**Figure S3:** IPCE of ITO | CuI | CsSnI<sub>3</sub> | C<sub>60</sub> (black - 10% excess SnI<sub>2</sub>) or PC<sub>60</sub>BM (red - 0% excess SnI<sub>2</sub>) | BCP | Al device.

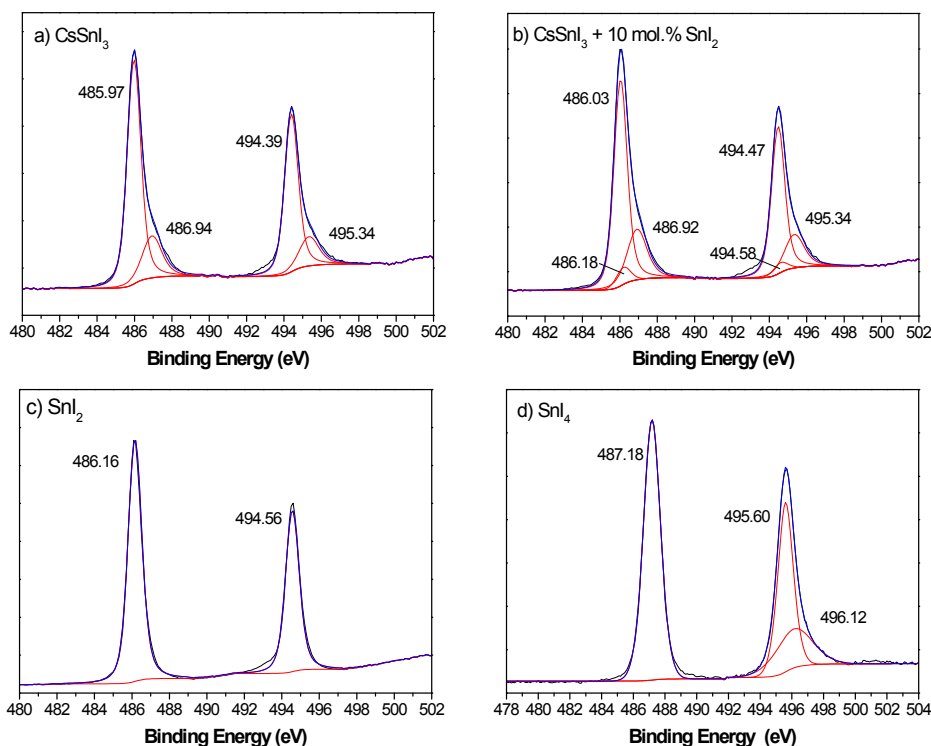

**Figure S4:** High resolution XPS spectra and peak fitting of the Sn 3d region for: **(a)** a CsSnI<sub>3</sub> film prepared from stoichiometric quantities of CsI and SnI<sub>2</sub>. The shoulder at high binding energy on both peaks is assigned to Sn in a Cs<sub>2</sub>SnI<sub>6</sub> environment. The binding energies for Sn in a Cs<sub>2</sub>SnI<sub>6</sub> environment are given in Figure S2 (c). Cs<sub>2</sub>SnI<sub>6</sub> is present because the sample is unavoidably exposed to air for ~ 1 minute when being transferred from the nitrogen filled glove box to the spectrometer vacuum system; **(b)** a CsSnI<sub>3</sub> film prepared with 10 mol % excess SnI<sub>2</sub>. Notably, the peak fitting includes a small peak that can be assigned to Sn in a SnI<sub>2</sub> environment. The XPS spectrum for Sn 3d electrons in SnI<sub>2</sub> is given in **(c)**. Since ~ 95% of the photoelectrons originate from the top ~ 7 nm of the sample surface such a small SnI<sub>2</sub> peak is consistent with a very small amount of SnI<sub>2</sub> at the CsSnI<sub>3</sub> surface; **(c)** a SnI<sub>2</sub> film prepared by thermal evaporation; **(d)** a SnI<sub>4</sub> film prepared by thermal evaporation.

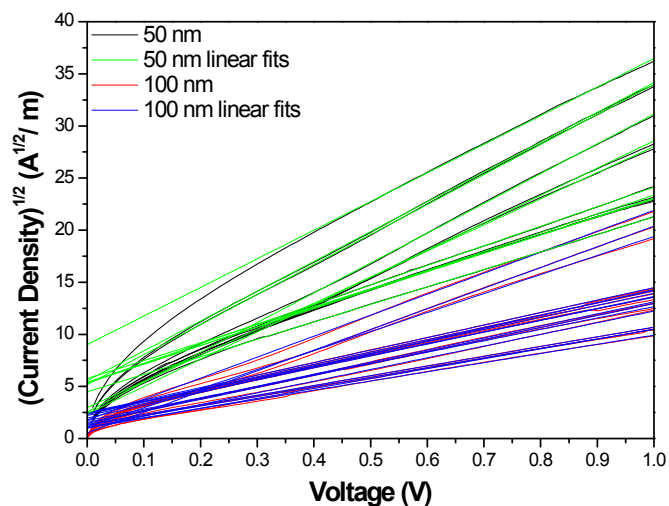

**Figure S5:**  $J^{0.5}$  vs.  $V$  graph for unipolar diodes with structure: ITO glass |  $\text{MoO}_3$  |  $\text{SnI}_2$  (50 or 100 nm) |  $\text{MoO}_3$  | Al. The hole mobility is extracted from the gradient assuming a trap free space charge limited current and  $\epsilon_r = 30.30$ .<sup>5</sup>

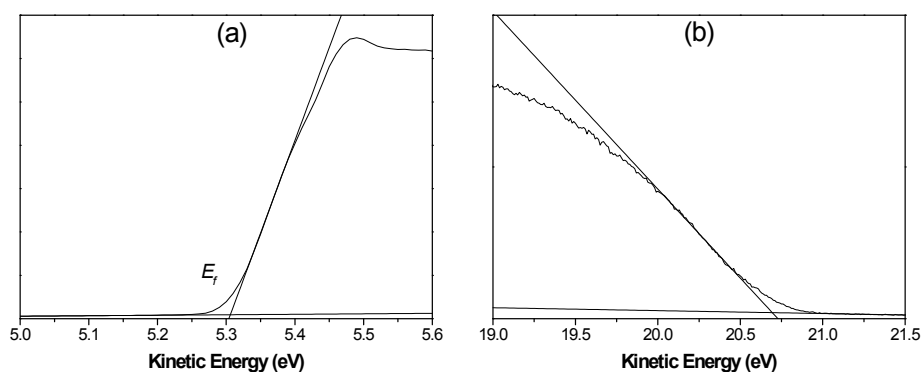

**Figure S6:** UPS spectra showing the secondary electron cut-off (a) and valence band edge (b) regions for CuI from which the ionization potential is estimated to be  $5.84 \text{ eV} \pm 0.05 \text{ eV}$ . Measurements were performed on 50 nm CuI films thermally evaporated onto Au substrates.

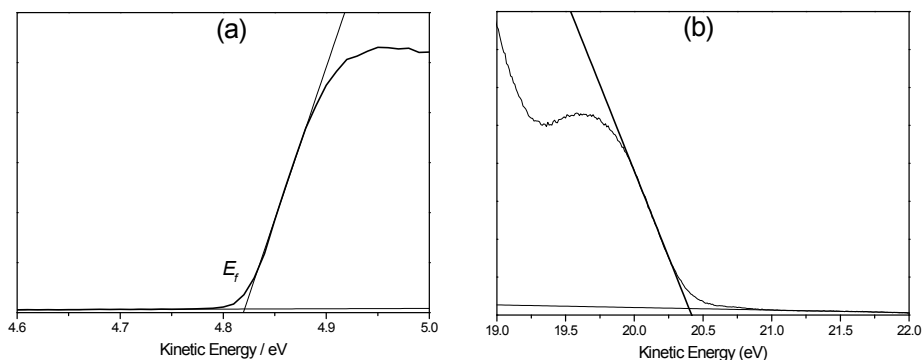

**Figure S7:** UPS spectra showing the secondary electron cut-off **(a)** and valence band edge **(b)** regions for SnI<sub>2</sub> on Au. The film was evaporated at 0.5 – 1 Å s<sup>-1</sup> to a thickness of 30 nm.

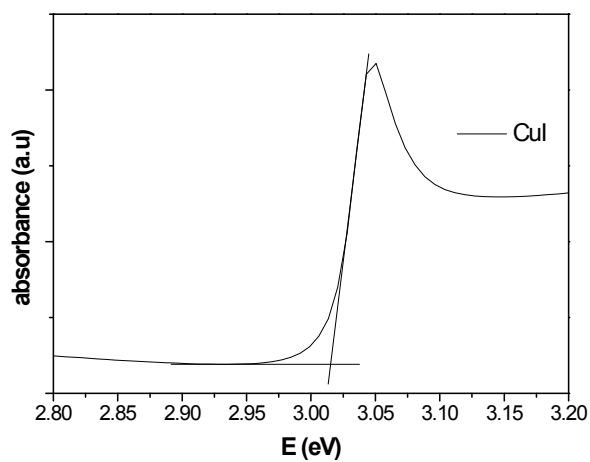

**Figure S8:** UV/ Vis/ NIR absorbance spectrum of a 100 nm CuI film deposited on glass by thermal evaporation. The  $E_g$  is estimated to be  $\sim 3.02$  eV.

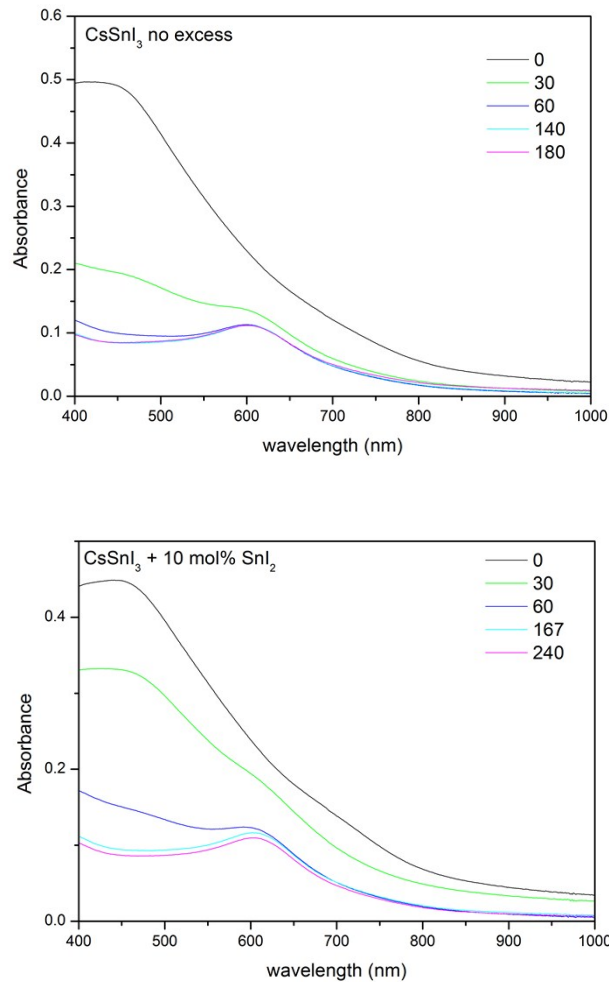

**Figure S9:** Absorption spectrum of CsSnI<sub>3</sub> films spun cast at 4000 rpm from an 8 wt.% DMF solution onto glass with 0 mol% (top) and 10 mol% (bottom) excess SnI<sub>2</sub>, measured at various time intervals (in minutes) after exposure to laboratory air. The spectra convert from that of CsSnI<sub>3</sub> to that of Cs<sub>2</sub>SnI<sub>6</sub> over a time frame of ~ 60 minutes. However, perovskite films sandwiched between the charge transport layers and electrodes in a PV device are expected to oxidise more slowly than a perovskite film on glass (as above) and so the rate of oxidation of the isolated film cannot be compared directly with the rate of device degradation.

| Device                                                 | n  | $V_{oc}$ / V  | $J_{sc}$ / mA cm <sup>-2</sup> | FF            | $\eta$ / %  | $\eta$ (best) / % |
|--------------------------------------------------------|----|---------------|--------------------------------|---------------|-------------|-------------------|
| C <sub>60</sub> (40nm), using solution processable CuI | 18 | 0.243 ± 0.024 | 11.43 ± 0.89                   | 0.413 ± 0.028 | 1.16 ± 0.21 | 1.40              |
| C <sub>60</sub> (40 nm) no CuI                         | 17 | 0.262 ± 0.031 | 11.67 ± 0.50                   | 0.375 ± 0.022 | 1.16 ± 0.18 | 1.40              |
| C <sub>60</sub> (40nm) 100 nm CuI                      | 18 | 0.282 ± 0.030 | 11.6 ± 1.0                     | 0.434 ± 0.032 | 1.42 ± 0.23 | 1.72              |
| PC <sub>61</sub> BM (15mg ml <sup>-1</sup> ) no CuI    | 11 | 0.261 ± 0.042 | 8.6 ± 1.1                      | 0.42 ± 0.065  | 1.02 ± 0.39 | 1.59              |
| PCBM (15 mg ml <sup>-1</sup> ), 70 nm CuI              | 16 | 0.355 ± 0.026 | 8.94 ± 0.27                    | 0.538 ± 0.043 | 1.72 ± 0.26 | 2.07              |
| ICBA (7mg ml <sup>-1</sup> , 1000 rpm) no CuI          | 17 | 0.352 ± 0.033 | 10.7 ± 1.8                     | 0.468 ± 0.075 | 1.79 ± 0.56 | 2.65              |
| ICBA (5 mg ml <sup>-1</sup> ) 100 nm CuI               | 16 | 0.491 ± 0.057 | 7.01 ± 0.68                    | 0.500 ± 0.045 | 1.73 ± 0.44 | 2.60              |
| ICBA (3 mg ml <sup>-1</sup> ) 100 nm CuI               | 14 | 0.430 ± 0.061 | 12.30 ± 0.48                   | 0.395 ± 0.053 | 2.13 ± 0.53 | 2.76              |

**Table S1:** Key PPV device characteristics summarizing the performance of devices using 10 mol% excess SnI<sub>2</sub> in the CsSnI<sub>3</sub> layer and different electron acceptors with and without a CuI HTL. Also included in the table is data relating to devices fabricated using a solution processed CuI layer. The errors are given as ± 1 S.D. n is the device sample size in each case.

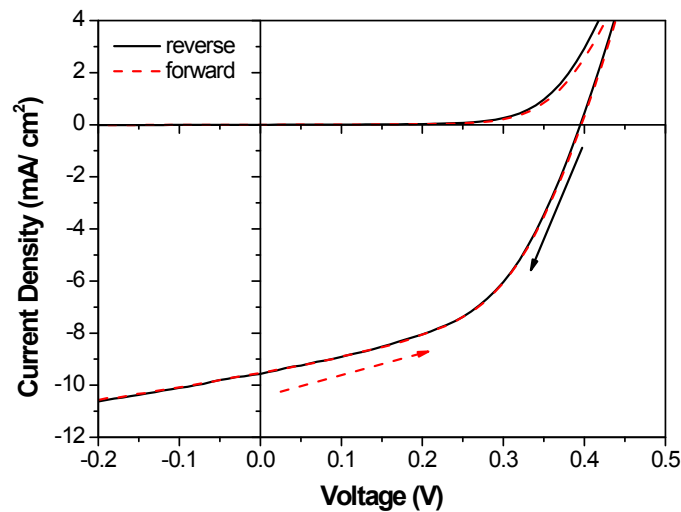

**Figure S10:** JV curve of individual ITO|CuI|CsSnI<sub>3</sub>|PC<sub>61</sub>BM|BCP|Al device with forward (-1 V to +1 V) and reverse (+1 V to -1 V) scans showing negligible hysteresis effect.

## References

1. P. R. Moses, L. M. Wier, J. C. Lennox, H. O. Finklea, J. R. Lenhard, and R. W. Murray, *Anal. Chem.*, 1978, **50**, 576–585.
2. W.-K. Choi, H.-J. Jung, and S.-K. Koh, *J. Vac. Sci. Technol. A Vacuum, Surfaces, Film.*, 1996, **14**, 359–366.
3. A. Pashutski, A. Hoffman, and M. Folman, *Surf. Sci. Lett.*, 1989, **208**, L91–L97.
4. S. Suzer, T. Voscoboinikov, K. R. Hallam, and G. C. Allen, *Fresenius. J. Anal. Chem.*, 1996, **355**, 654–656.
5. C. C. Desai, J. L. Rai, and A. D. Vyas, *J. Mater. Sci.*, 1982, **17**, 3249–3252.
